# Supplementary material for: Interest in Cancer Predisposition Testing and Carrier Screening Offered as Part of Routine Healthcare Among an Ethnically Diverse Sample of Young Women
Source: PubMed Central journal article supplement (PMC9047995; doi:10.3389/fgene.2022.866062), 2022-04-14
Supplement: DataSheet1.pdf [file DataSheet1.pdf]

## Supplemental File 1. Survey items

Screening questions.

What is your age? \_\_\_\_\_

What is your gender?

What is your ethnicity?

- Latino/Hispanic
- Non-Hispanic/non-Latino
- Other \_\_\_\_\_

**Our team is doing a study to better understand women’s interest in learning different types of genetic information. We would like to hear your thoughts.**

**Section 1:**

**Nowadays, it is possible to predict whether or not a person is likely to develop certain diseases by analyzing their genes. This is called genetic testing. Genetic testing is currently available for a limited number of diseases, but it may be available for more diseases in the future.**

**Genetic testing could tell you about your risks of different types of diseases.**

- **You could learn about your risk of developing a disease that may be able to be prevented or treated.** For example, you could learn that you are more likely to develop colon cancer. In this case, your doctor might recommend that you screen for colon cancer more often.
- **You could learn about your risk of developing a disease that cannot be prevented or treated.** For example, you could learn that you are more likely to develop a muscle disorder that gets worse over time or that you are more likely to develop early dementia from a disease that we don’t know how to prevent or treat.
- **You could also learn more about how you respond to a medication for a disease.** For example, you could learn that a certain treatment would not be helpful for you or that you need a different dose of a medicine in order for it to work. You might also learn that you are more or less likely to develop a side effect from a certain treatment.

Another type of information that you might learn from genetic testing **is about a variation in one of your genes that does not affect your health, but could cause health problems if passed on to a child.** For example, you could learn that you have a variation in the gene that causes cystic fibrosis or a variation in the gene that causes sickle cell disease. Having a variation in this type of gene would not cause any health problems for you. But if you were to have children with someone who also had a variation in the same gene, then your children could be born with these serious diseases.

**On a scale from 1 to 7, where 1 means not at all interested, and 7 means very interested, if it were offered by a doctor how interested would you be in doing genetic testing to learn about:**

|                                                                                          | Not at all interested |                       |                       | Somewhat interested   |                       |                       | Very interested       |
|------------------------------------------------------------------------------------------|-----------------------|-----------------------|-----------------------|-----------------------|-----------------------|-----------------------|-----------------------|
| Q5_1 Your risk of developing a disease that may be able to be prevented or treated       | <input type="radio"/> | <input type="radio"/> | <input type="radio"/> | <input type="radio"/> | <input type="radio"/> | <input type="radio"/> | <input type="radio"/> |
|                                                                                          | 1                     |                       |                       | 4                     |                       |                       | 7                     |
| Q5_2 Your risk of developing a <u>cancer</u> that may be able to be prevented or treated | <input type="radio"/> | <input type="radio"/> | <input type="radio"/> | <input type="radio"/> | <input type="radio"/> | <input type="radio"/> | <input type="radio"/> |
|                                                                                          | 1                     |                       |                       | 4                     |                       |                       | 7                     |



|                                                                                                     |                       |                       |                       |
|-----------------------------------------------------------------------------------------------------|-----------------------|-----------------------|-----------------------|
| Q8_3 Your risk of developing a disease that cannot be prevented or treated                          | <input type="radio"/> | <input type="radio"/> | <input type="radio"/> |
| Q8_4 How you would respond to a medication for a disease                                            | <input type="radio"/> | <input type="radio"/> | <input type="radio"/> |
| Q8_5 A gene variation that does not affect your health but might affect the health of your children | <input type="radio"/> | <input type="radio"/> | <input type="radio"/> |

**Section 2:**

**For the next set of questions, we'd like to find out more about how you think about inherited risk.**

**On a scale from 1 to 7 where 1 is not at all worried, and 7 is extremely worried, please describe how worried you are about the following:**

|                                                                                                                 |                                                  |                       |                       |                                                |                       |                                                 |
|-----------------------------------------------------------------------------------------------------------------|--------------------------------------------------|-----------------------|-----------------------|------------------------------------------------|-----------------------|-------------------------------------------------|
| Q9_1 That your genes put you at increased risk for developing a common disease, like heart disease or diabetes. | Not at all worried<br><input type="radio"/><br>1 | <input type="radio"/> | <input type="radio"/> | Somewhat worried<br><input type="radio"/><br>4 | <input type="radio"/> | Extremely worried<br><input type="radio"/><br>7 |
| Q9_2 That you have a genetic variation that means you will certainly develop a disease.                         | <input type="radio"/><br>1                       | <input type="radio"/> | <input type="radio"/> | <input type="radio"/><br>4                     | <input type="radio"/> | <input type="radio"/><br>7                      |
| Q9_3 That your children could be affected with a genetic condition that you have passed on.                     | <input type="radio"/><br>1                       | <input type="radio"/> | <input type="radio"/> | <input type="radio"/><br>4                     | <input type="radio"/> | <input type="radio"/><br>7                      |

**On a scale from 1 to 5 where 1 is strongly disagree, and 5 is strongly agree, how much do you agree or disagree with the following statements:**

|                                                          |                                                 |                                                 |                                                          |                                              |                                              |
|----------------------------------------------------------|-------------------------------------------------|-------------------------------------------------|----------------------------------------------------------|----------------------------------------------|----------------------------------------------|
| Q10_1 I know how to assess the role of genes for health. | Strongly disagree<br><input type="radio"/><br>1 | Somewhat disagree<br><input type="radio"/><br>2 | Neither agree nor disagree<br><input type="radio"/><br>3 | Somewhat agree<br><input type="radio"/><br>4 | Strongly agree<br><input type="radio"/><br>5 |
| Q10_2. I know how to assess my genetic risk for disease. | Strongly disagree<br><input type="radio"/><br>1 | Somewhat disagree<br><input type="radio"/><br>2 | Neither agree nor disagree<br><input type="radio"/><br>3 | Somewhat agree<br><input type="radio"/><br>4 | Strongly agree<br><input type="radio"/><br>5 |

|                                               |                             |                             |                                      |                          |                          |
|-----------------------------------------------|-----------------------------|-----------------------------|--------------------------------------|--------------------------|--------------------------|
| Q10_3 I can explain genetic issues to people. | Strongly disagree<br>○<br>1 | Somewhat disagree<br>○<br>2 | Neither agree nor disagree<br>○<br>3 | Somewhat agree<br>○<br>4 | Strongly agree<br>○<br>5 |
|-----------------------------------------------|-----------------------------|-----------------------------|--------------------------------------|--------------------------|--------------------------|

**Would you say that the following statements are true or false?**

|                                                                                               | True                  | False                 | Not sure              |
|-----------------------------------------------------------------------------------------------|-----------------------|-----------------------|-----------------------|
| Q11_1 Some diseases are caused by genes, environment, and lifestyle.                          | <input type="radio"/> | <input type="radio"/> | <input type="radio"/> |
| Q11_2 A gene is a disease.                                                                    | <input type="radio"/> | <input type="radio"/> | <input type="radio"/> |
| Q11_3 You can see a gene with the naked eye.                                                  | <input type="radio"/> | <input type="radio"/> | <input type="radio"/> |
| Q11_4 Healthy parents can have a child with an inherited disease.                             | <input type="radio"/> | <input type="radio"/> | <input type="radio"/> |
| Q11_5 A person with an altered (mutated) gene may be completely healthy.                      | <input type="radio"/> | <input type="radio"/> | <input type="radio"/> |
| Q11_6 All serious diseases are inherited.                                                     | <input type="radio"/> | <input type="radio"/> | <input type="radio"/> |
| Q11_7 Genes are instructions for making proteins, which help the body grow and work properly. | <input type="radio"/> | <input type="radio"/> | <input type="radio"/> |
| Q11_8 The child of a person with an inherited disease will always have the same disease.      | <input type="radio"/> | <input type="radio"/> | <input type="radio"/> |
| Q11_9 A gene is a piece of DNA.                                                               | <input type="radio"/> | <input type="radio"/> | <input type="radio"/> |
| Q11_10 Altered (mutated) genes can cause disease.                                             | <input type="radio"/> | <input type="radio"/> | <input type="radio"/> |
| Q11_11 Genes are inside of cells.                                                             | <input type="radio"/> | <input type="radio"/> | <input type="radio"/> |
| Q11_12 A chromosome contains many genes.                                                      | <input type="radio"/> | <input type="radio"/> | <input type="radio"/> |
| Q11_13 Genes determine traits such as height, eye color, and facial appearance.               | <input type="radio"/> | <input type="radio"/> | <input type="radio"/> |
| Q11_14 A person has thousands of genes.                                                       | <input type="radio"/> | <input type="radio"/> | <input type="radio"/> |
| Q11_15 Identical twins have different sets of genes.                                          | <input type="radio"/> | <input type="radio"/> | <input type="radio"/> |
| Q11_16 Humans have 20 pairs of chromosomes.                                                   | <input type="radio"/> | <input type="radio"/> | <input type="radio"/> |

|                                                                                               |                       |                       |                       |
|-----------------------------------------------------------------------------------------------|-----------------------|-----------------------|-----------------------|
| Q11_17 Parents pass both copies of each chromosome to their child.                            | <input type="radio"/> | <input type="radio"/> | <input type="radio"/> |
| Q11_18 A genetic test can tell you if you have a higher chance to develop a specific disease. | <input type="radio"/> | <input type="radio"/> | <input type="radio"/> |

**Q12\_1. On a scale from 1 to 7 where 1 is not at all important, and 7 is very important, please mark how important it is to you to learn more about how your genes may affect your chance of getting cancer.**

|                       |                       |                       |                       |                       |                       |                       |
|-----------------------|-----------------------|-----------------------|-----------------------|-----------------------|-----------------------|-----------------------|
| Not at all important  |                       | Somewhat important    |                       |                       | Very important        |                       |
| <input type="radio"/> | <input type="radio"/> | <input type="radio"/> | <input type="radio"/> | <input type="radio"/> | <input type="radio"/> | <input type="radio"/> |
| 1                     |                       | 4                     |                       |                       |                       | 7                     |

**Q12\_2. ...the health of any future children.**

|                       |                       |                       |                       |                       |                       |                       |
|-----------------------|-----------------------|-----------------------|-----------------------|-----------------------|-----------------------|-----------------------|
| Not at all important  |                       | Somewhat important    |                       |                       | Very important        |                       |
| <input type="radio"/> | <input type="radio"/> | <input type="radio"/> | <input type="radio"/> | <input type="radio"/> | <input type="radio"/> | <input type="radio"/> |
| 1                     |                       | 4                     |                       |                       |                       | 7                     |

**Section 3:**

**For the next set of questions, we'd like to find out more about how you think about health and health information.**

**On a scale from 1 to 5 where 1 is strongly disagree, and 5 is strongly agree, how much do you agree or disagree with the following statements:**

|                                                                                              | Strongly disagree          | Somewhat disagree          | Neither agree nor disagree | Somewhat agree             | Strongly agree             |
|----------------------------------------------------------------------------------------------|----------------------------|----------------------------|----------------------------|----------------------------|----------------------------|
| Q14_1 Living life in best possible health is very important to me                            | <input type="radio"/><br>1 | <input type="radio"/><br>2 | <input type="radio"/><br>3 | <input type="radio"/><br>4 | <input type="radio"/><br>5 |
| Q14_2 Eating right, exercising, and taking preventive measures will keep me healthy for life | <input type="radio"/><br>1 | <input type="radio"/><br>2 | <input type="radio"/><br>3 | <input type="radio"/><br>4 | <input type="radio"/><br>5 |
| Q14_3 My health depends on how well I take care of myself                                    | <input type="radio"/><br>1 | <input type="radio"/><br>2 | <input type="radio"/><br>3 | <input type="radio"/><br>4 | <input type="radio"/><br>5 |
| Q14_4 I actively try to prevent disease and illness                                          | <input type="radio"/><br>1 | <input type="radio"/><br>2 | <input type="radio"/><br>3 | <input type="radio"/><br>4 | <input type="radio"/><br>5 |

|                                                                                                                |                            |                            |                            |                            |                            |
|----------------------------------------------------------------------------------------------------------------|----------------------------|----------------------------|----------------------------|----------------------------|----------------------------|
| Q14_5 I do everything I can to stay healthy                                                                    | <input type="radio"/><br>1 | <input type="radio"/><br>2 | <input type="radio"/><br>3 | <input type="radio"/><br>4 | <input type="radio"/><br>5 |
| Q14_6 I make a point to read and watch stories about health                                                    | <input type="radio"/><br>1 | <input type="radio"/><br>2 | <input type="radio"/><br>3 | <input type="radio"/><br>4 | <input type="radio"/><br>5 |
| Q14_7 I really enjoy learning about health issues                                                              | <input type="radio"/><br>1 | <input type="radio"/><br>2 | <input type="radio"/><br>3 | <input type="radio"/><br>4 | <input type="radio"/><br>5 |
| Q14_8 To be and stay healthy it's critical to be informed about health issues                                  | <input type="radio"/><br>1 | <input type="radio"/><br>2 | <input type="radio"/><br>3 | <input type="radio"/><br>4 | <input type="radio"/><br>5 |
| Q14_9) The amount of health information available today makes it easier for me to take care of my health       | <input type="radio"/><br>1 | <input type="radio"/><br>2 | <input type="radio"/><br>3 | <input type="radio"/><br>4 | <input type="radio"/><br>5 |
| Q14_10) When I take medicine, I try to get as much information as possible about its benefits and side effects | <input type="radio"/><br>1 | <input type="radio"/><br>2 | <input type="radio"/><br>3 | <input type="radio"/><br>4 | <input type="radio"/><br>5 |
| Q14_11) I need to know about health issues so I can keep myself and my family healthy                          | <input type="radio"/><br>1 | <input type="radio"/><br>2 | <input type="radio"/><br>3 | <input type="radio"/><br>4 | <input type="radio"/><br>5 |
| Q14_12) Before making a decision about my health, I find out everything I can about this issue                 | <input type="radio"/><br>1 | <input type="radio"/><br>2 | <input type="radio"/><br>3 | <input type="radio"/><br>4 | <input type="radio"/><br>5 |
| Q14_13) It's important to me to be informed about health issues                                                | <input type="radio"/><br>1 | <input type="radio"/><br>2 | <input type="radio"/><br>3 | <input type="radio"/><br>4 | <input type="radio"/><br>5 |

**Q15) In the past 30 days, how often would you say you have looked for information about ways to stay healthy or to feel better?**

- |                                         |                                         |
|-----------------------------------------|-----------------------------------------|
| <input type="checkbox"/> Very often     | <input type="checkbox"/> Not very often |
| <input type="checkbox"/> Somewhat often | <input type="checkbox"/> Not at all     |

**Q16. Compared to other people your gender, age, and race, how likely do you think you are to get each of the following types of cancer in your lifetime?**

|                       | A lot less likely     | Somewhat less likely  | About as likely       | Somewhat more likely  | A lot more likely     |
|-----------------------|-----------------------|-----------------------|-----------------------|-----------------------|-----------------------|
| Q16_1) Breast cancer  | <input type="radio"/> | <input type="radio"/> | <input type="radio"/> | <input type="radio"/> | <input type="radio"/> |
| Q16_2) Ovarian cancer | <input type="radio"/> | <input type="radio"/> | <input type="radio"/> | <input type="radio"/> | <input type="radio"/> |
| Q16_3) Colon cancer   | <input type="radio"/> | <input type="radio"/> | <input type="radio"/> | <input type="radio"/> | <input type="radio"/> |

**On a scale from 1 to 7 where 1 is strongly disagree, and 7 is strongly agree, please mark how much you agree or disagree with the following statement:**

Q17) The people who mean the most to me think I should learn more about ways I can keep myself healthy.

|                       |                       |                       |                            |                       |                       |                       |
|-----------------------|-----------------------|-----------------------|----------------------------|-----------------------|-----------------------|-----------------------|
| Strongly disagree     |                       |                       | Neither agree nor disagree |                       |                       | Strongly agree        |
| <input type="radio"/> | <input type="radio"/> | <input type="radio"/> | <input type="radio"/>      | <input type="radio"/> | <input type="radio"/> | <input type="radio"/> |
| 1                     |                       |                       | 4                          |                       |                       | 7                     |

**Q18) On a scale from 1 to 7 where 1 is not at all motivated, and 7 is very motivated, how motivated you would say you are to do what these people want you to do?**

|                       |                       |                       |                       |                       |                       |                       |
|-----------------------|-----------------------|-----------------------|-----------------------|-----------------------|-----------------------|-----------------------|
| Not at all motivated  |                       |                       | Somewhat motivated    |                       |                       | Very motivated        |
| <input type="radio"/> | <input type="radio"/> | <input type="radio"/> | <input type="radio"/> | <input type="radio"/> | <input type="radio"/> | <input type="radio"/> |
| 1                     |                       |                       | 4                     |                       |                       | 7                     |

**On a scale from 1 to 5 where 1 is not at all characteristic of me, and 5 is entirely characteristic of me, please check the best answer for the following statements:**

|                                                                                        | Not at all characteristic of me |                       |                       | Entirely characteristic of me |                       |
|----------------------------------------------------------------------------------------|---------------------------------|-----------------------|-----------------------|-------------------------------|-----------------------|
| Q19_1) Unforeseen events upset me greatly                                              | <input type="radio"/>           | <input type="radio"/> | <input type="radio"/> | <input type="radio"/>         | <input type="radio"/> |
|                                                                                        | 1                               | 2                     | 3                     | 4                             | 5                     |
| Q19_2) It frustrates me not having all the information I need.                         | <input type="radio"/>           | <input type="radio"/> | <input type="radio"/> | <input type="radio"/>         | <input type="radio"/> |
|                                                                                        | 1                               | 2                     | 3                     | 4                             | 5                     |
| Q19_3) One should always look ahead so as to avoid surprises.                          | <input type="radio"/>           | <input type="radio"/> | <input type="radio"/> | <input type="radio"/>         | <input type="radio"/> |
|                                                                                        | 1                               | 2                     | 3                     | 4                             | 5                     |
| Q19_4) A small, unforeseen event can spoil everything, even with the best of planning. | <input type="radio"/>           | <input type="radio"/> | <input type="radio"/> | <input type="radio"/>         | <input type="radio"/> |
|                                                                                        | 1                               | 2                     | 3                     | 4                             | 5                     |

|                                                                   |                       |                       |                       |                       |                       |
|-------------------------------------------------------------------|-----------------------|-----------------------|-----------------------|-----------------------|-----------------------|
| Q19_5) I always want to know what the future has in store for me. | <input type="radio"/> | <input type="radio"/> | <input type="radio"/> | <input type="radio"/> | <input type="radio"/> |
|                                                                   | 1                     | 2                     | 3                     | 4                     | 5                     |
| Q19_6) I can't stand being taken by surprise.                     | <input type="radio"/> | <input type="radio"/> | <input type="radio"/> | <input type="radio"/> | <input type="radio"/> |
|                                                                   | 1                     | 2                     | 3                     | 4                     | 5                     |
| Q19_7) I should be able to organize everything in advance.        | <input type="radio"/> | <input type="radio"/> | <input type="radio"/> | <input type="radio"/> | <input type="radio"/> |
|                                                                   | 1                     | 2                     | 3                     | 4                     | 5                     |
| Q19_8) Uncertainty keeps me from living a full life.              | <input type="radio"/> | <input type="radio"/> | <input type="radio"/> | <input type="radio"/> | <input type="radio"/> |
|                                                                   | 1                     | 2                     | 3                     | 4                     | 5                     |
| Q19_9) When it's time to act, uncertainty paralyzes me.           | <input type="radio"/> | <input type="radio"/> | <input type="radio"/> | <input type="radio"/> | <input type="radio"/> |
|                                                                   | 1                     | 2                     | 3                     | 4                     | 5                     |
| Q19_10) When I am uncertain I can't function very well.           | <input type="radio"/> | <input type="radio"/> | <input type="radio"/> | <input type="radio"/> | <input type="radio"/> |
|                                                                   | 1                     | 2                     | 3                     | 4                     | 5                     |
| Q19_11) The smallest doubt can stop me from acting.               | <input type="radio"/> | <input type="radio"/> | <input type="radio"/> | <input type="radio"/> | <input type="radio"/> |
|                                                                   | 1                     | 2                     | 3                     | 4                     | 5                     |
| Q19_12) I must get away from all uncertain situations.            | <input type="radio"/> | <input type="radio"/> | <input type="radio"/> | <input type="radio"/> | <input type="radio"/> |
|                                                                   | 1                     | 2                     | 3                     | 4                     | 5                     |

**Section 4:**

**For the last set of questions, we'd like to ask more about you.**

Q22) What is the highest level of school that you have completed?

- Junior high or some High school
- High school degree or GED
- Some college
- Associate degree
- College degree
- Graduate degree

Q24) What is your race? (Check all that apply)

- White/Caucasian
- African-American/Black
- Asian
- Pacific Islander/Native Hawaiian
- Native American/Alaska Native
- Other \_\_\_\_\_

Q25) Do your parents or grandparents have any Ashkenazi (Eastern European) Jewish ancestry?

- Yes
- No
- Not sure

Q26) What is your marital status?

- Married
- Living as married
- Divorced
- Separated
- Never been married
- Widowed

Q27) Do you have any biological children?

- Yes
- No

Q28) Are you planning to become pregnant in the next year?

- Yes
- No
- Not sure

Q29) What is your zip code? \_\_\_\_\_

Q30) Think about your household's total income. About how much did your household receive in the last year?

- Less than \$25,000
- \$25,000 - \$49,999
- \$50,000 - \$74,999
- \$75,000 - \$99,999
- \$100,000 or higher
- Prefer not to answer

Q31) Do you currently have health insurance?

- Yes, I have private insurance (for example, through my job, HMO)
- Yes, I have public insurance (for example, Medicaid, Medicare)
- No

Q32) Have you ever received genetic testing as part of your clinical care?

- Yes. {(Q33) if yes, what type\_\_\_\_\_}
- No
- Don't know

Q34) Have you ever been diagnosed as having cancer?

- Yes. {(Q35) if yes, what type\_\_\_\_\_}
- No

Q36) Have any of your family members ever had cancer?

- Yes. {(Q37) if yes, what type\_\_\_\_\_}
- No



Q43) How often do you have someone (like a family member, friend, hospital/clinic worker or caregiver) help you read hospital materials?

|                     |                         |                     |                     |                    |
|---------------------|-------------------------|---------------------|---------------------|--------------------|
| None of<br>the time | A little of<br>the time | Some of<br>the time | Most of<br>the time | All of<br>the time |
| 1                   | 2                       | 3                   | 4                   | 5                  |

Q44) How often do you have problems learning about your medical condition because of difficulty understanding written information?

|                     |                         |                     |                     |                    |
|---------------------|-------------------------|---------------------|---------------------|--------------------|
| None of<br>the time | A little of<br>the time | Some of<br>the time | Most of<br>the time | All of<br>the time |
| 1                   | 2                       | 3                   | 4                   | 5                  |

Q45) How confident are you filling out medical forms by yourself?

|            |              |          |             |           |
|------------|--------------|----------|-------------|-----------|
| Not at all | A little bit | Somewhat | Quite a bit | Extremely |
| 1          | 2            | 3        | 4           | 5         |

**That is the end of the questions. Do you have anything else that you would like to share with the research team?**

**Thank you again for agreeing to share this information with us.**
